# Supplementary material for: MMP-11 expression in early luminal breast cancer: associations with clinical, MRI, pathological characteristics, and disease-free survival
Source: Springer Nature journal article supplement (doi:10.1186/s12885-024-11998-0), 2024-03-04
Supplement: MOESM1 [file 26810698]

A

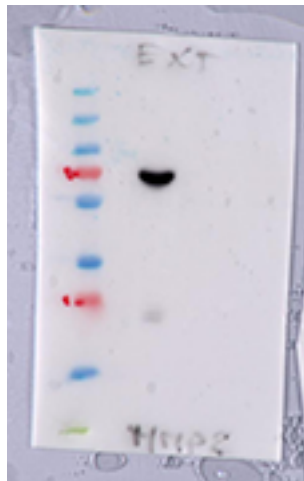

probed MMP2

B

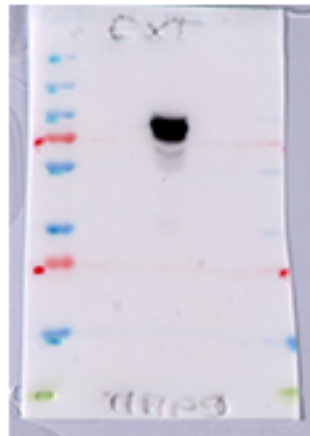

probed MMP9

C

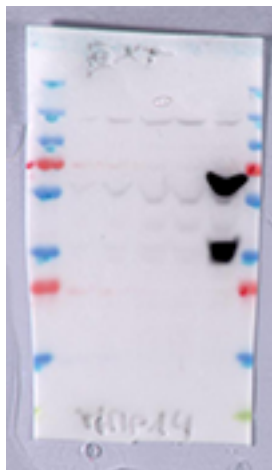

probed MMP14

D

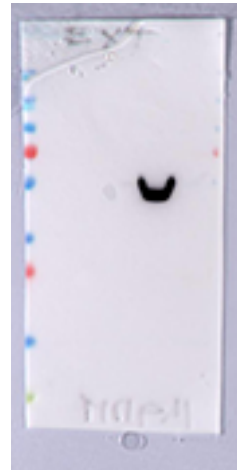

probed MMP11

E

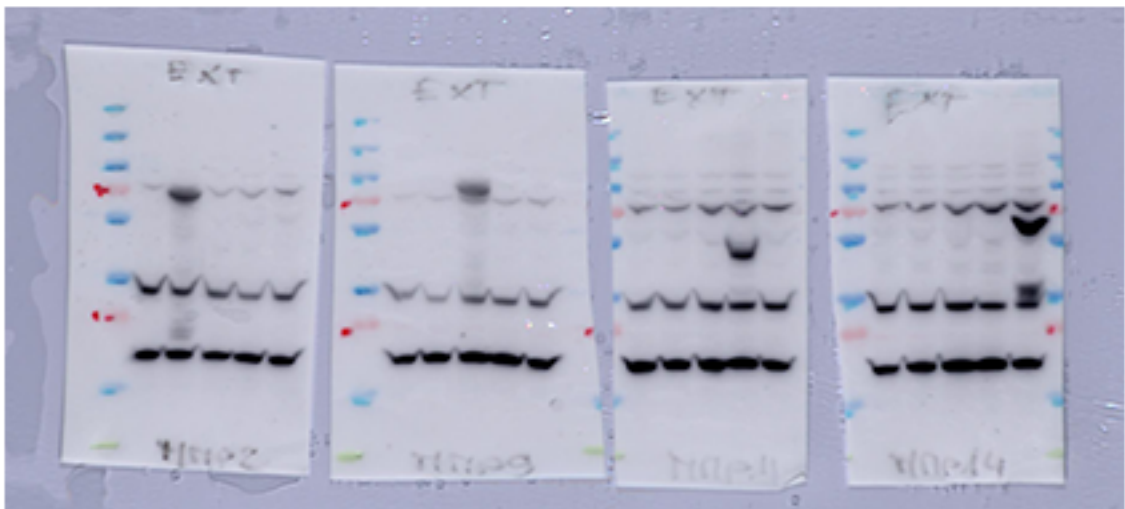

reprobed GAPDH/ reprobed RAB7
